# Supplementary material for: Short-term supplementation of EPA-enriched ethanolamine plasmalogen increases the level of DHA in the brain and liver of n-3 PUFA deficient mice in early life after weaning
Source: Royal Society of Chemistry journal article supplement (doi:10.1039/d1fo03345j), 2021-12-31
Supplement: d1fo03345j1.pdf [file d1fo03345j1.pdf]

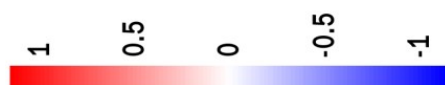

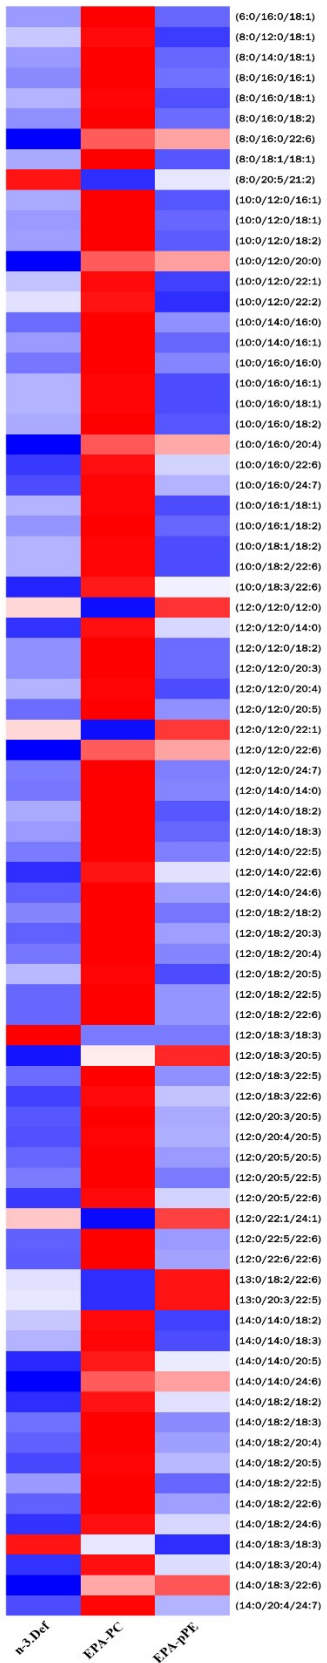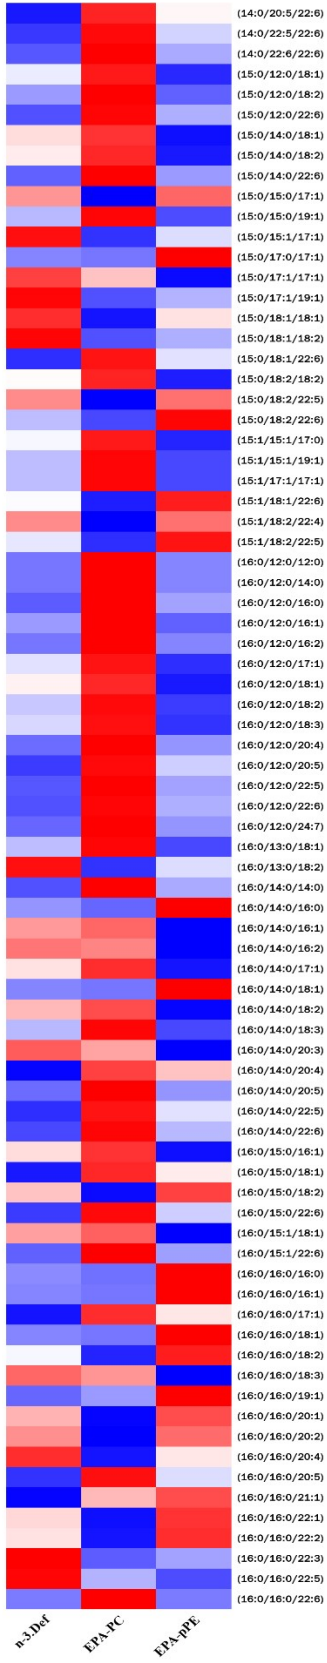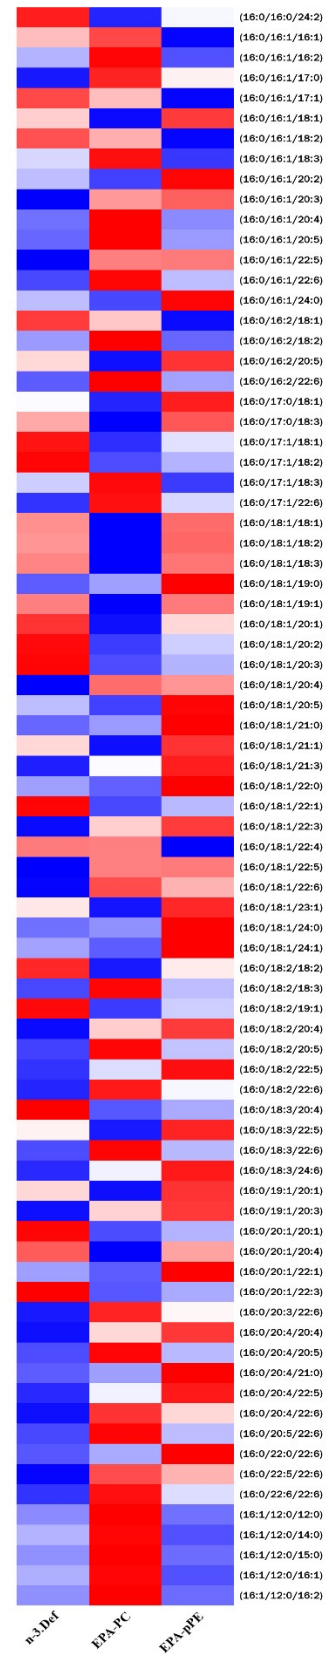

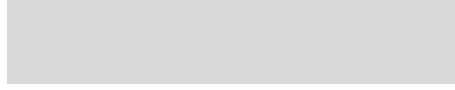

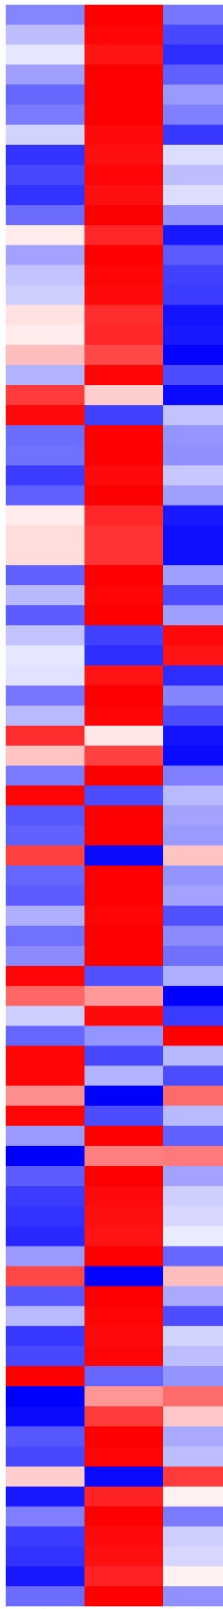

(16:1/12:0/17:1)  
 (16:1/12:0/18:1)  
 (16:1/12:0/18:2)  
 (16:1/12:0/18:3)  
 (16:1/12:0/20:3)  
 (16:1/12:0/20:4)  
 (16:1/12:0/20:5)  
 (16:1/12:0/22:5)  
 (16:1/12:0/22:6)  
 (16:1/12:0/24:6)  
 (16:1/12:0/24:7)  
 (16:1/13:0/18:1)  
 (16:1/14:0/15:0)  
 (16:1/14:0/16:1)  
 (16:1/14:0/16:2)  
 (16:1/14:0/17:0)  
 (16:1/14:0/17:1)  
 (16:1/14:0/18:1)  
 (16:1/14:0/18:2)  
 (16:1/14:0/18:3)  
 (16:1/14:0/20:3)  
 (16:1/14:0/20:4)  
 (16:1/14:0/20:5)  
 (16:1/14:0/22:5)  
 (16:1/14:0/22:6)  
 (16:1/15:0/16:1)  
 (16:1/15:0/18:1)  
 (16:1/15:0/18:2)  
 (16:1/15:0/22:6)  
 (16:1/15:1/18:1)  
 (16:1/15:1/18:2)  
 (16:1/15:1/20:5)  
 (16:1/15:1/22:6)  
 (16:1/16:1/16:1)  
 (16:1/16:1/16:2)  
 (16:1/16:1/17:1)  
 (16:1/16:1/18:1)  
 (16:1/16:1/18:2)  
 (16:1/16:1/18:3)  
 (16:1/16:1/20:2)  
 (16:1/16:1/20:4)  
 (16:1/16:1/20:5)  
 (16:1/16:1/21:2)  
 (16:1/16:1/22:5)  
 (16:1/16:1/22:6)  
 (16:1/16:2/18:1)  
 (16:1/16:2/18:2)  
 (16:1/16:2/20:5)  
 (16:1/17:0/18:1)  
 (16:1/17:0/18:2)  
 (16:1/17:0/18:3)  
 (16:1/17:0/20:3)  
 (16:1/17:1/18:1)  
 (16:1/17:1/18:2)  
 (16:1/18:1/18:1)  
 (16:1/18:1/18:2)  
 (16:1/18:1/18:3)  
 (16:1/18:1/20:4)  
 (16:1/18:1/20:5)  
 (16:1/18:1/22:5)  
 (16:1/18:1/22:6)  
 (16:1/18:2/18:2)  
 (16:1/18:2/18:3)  
 (16:1/18:2/19:1)  
 (16:1/18:2/20:4)  
 (16:1/18:2/20:5)  
 (16:1/18:2/22:5)  
 (16:1/18:3/18:3)  
 (16:1/18:3/20:3)  
 (16:1/18:3/20:4)  
 (16:1/18:3/22:5)  
 (16:1/18:3/22:6)  
 (16:1/19:0/20:1)  
 (16:1/20:4/22:6)  
 (16:1/20:5/20:5)  
 (16:1/20:5/22:6)  
 (16:1/22:5/22:5)  
 (16:1/22:6/22:6)

n-3 Def  
 EPA-PC  
 EPA-PPE

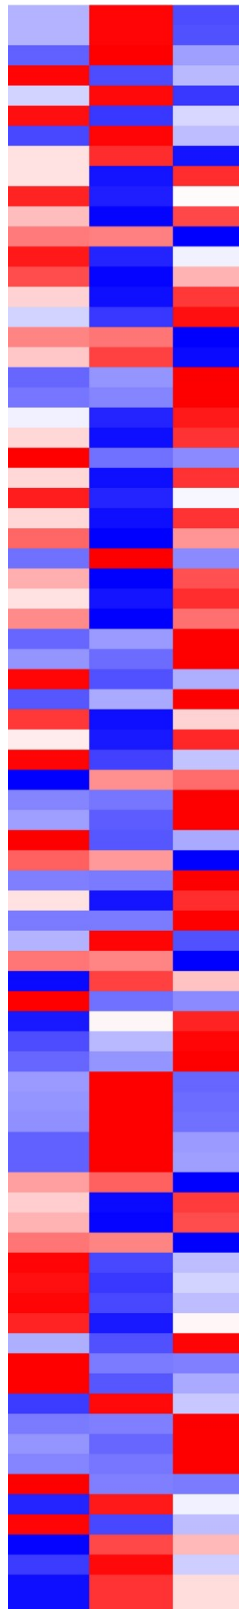

(16:2/12:0/18:1)  
 (16:2/14:0/18:1)  
 (16:2/16:2/18:1)  
 (16:2/18:1/18:1)  
 (16:2/18:1/18:2)  
 (16:2/18:1/20:5)  
 (16:2/18:2/24:7)  
 (17:0/12:0/18:1)  
 (17:0/17:0/21:2)  
 (17:0/17:1/17:1)  
 (17:0/18:1/18:1)  
 (17:1/12:0/18:1)  
 (17:1/17:1/19:1)  
 (17:1/18:1/18:2)  
 (17:1/18:1/20:4)  
 (17:1/18:2/20:5)  
 (18:0/12:0/16:1)  
 (18:0/12:0/20:4)  
 (18:0/15:1/18:0)  
 (18:0/16:0/18:0)  
 (18:0/16:0/18:1)  
 (18:0/16:0/20:1)  
 (18:0/16:0/20:4)  
 (18:0/16:0/21:2)  
 (18:0/16:0/22:2)  
 (18:0/16:0/22:4)  
 (18:0/16:0/22:5)  
 (18:0/16:0/22:6)  
 (18:0/16:1/16:1)  
 (18:0/17:1/20:1)  
 (18:0/18:0/18:2)  
 (18:0/18:0/19:1)  
 (18:0/18:0/20:1)  
 (18:0/18:0/20:2)  
 (18:0/18:0/22:6)  
 (18:0/18:1/18:1)  
 (18:0/18:1/19:1)  
 (18:0/18:1/20:2)  
 (18:0/18:1/20:3)  
 (18:0/18:1/20:4)  
 (18:0/18:1/22:1)  
 (18:0/18:1/22:3)  
 (18:0/18:1/22:4)  
 (18:0/18:1/24:1)  
 (18:0/18:2/19:0)  
 (18:0/18:3/18:3)  
 (18:0/20:0/22:6)  
 (18:0/20:1/20:4)  
 (18:0/20:3/22:6)  
 (18:0/20:4/22:1)  
 (18:0/20:4/22:6)  
 (18:0p/18:1/20:4)  
 (18:0p/16:0/18:0)  
 (18:1/12:0/14:0)  
 (18:1/12:0/18:3)  
 (18:1/12:0/20:3)  
 (18:1/12:0/22:5)  
 (18:1/12:0/22:6)  
 (18:1/13:0/18:1)  
 (18:1/14:0/14:0)  
 (18:1/14:0/18:1)  
 (18:1/14:0/18:2)  
 (18:1/18:1/18:1)  
 (18:1/18:1/18:2)  
 (18:1/18:1/19:1)  
 (18:1/18:1/20:3)  
 (18:1/18:1/21:0)  
 (18:1/18:1/22:1)  
 (18:1/18:1/22:2)  
 (18:1/18:1/22:4)  
 (18:1/18:1/23:3)  
 (18:1/18:1/24:0)  
 (18:1/18:1/24:1)  
 (18:1/18:1/24:2)  
 (18:1/18:1/24:7)  
 (18:1/18:2/19:1)  
 (18:1/18:2/20:3)  
 (18:1/18:2/20:4)  
 (18:1/18:2/20:5)  
 (18:1/18:2/22:6)

n-3 Def  
 EPA-PC  
 EPA-PPE

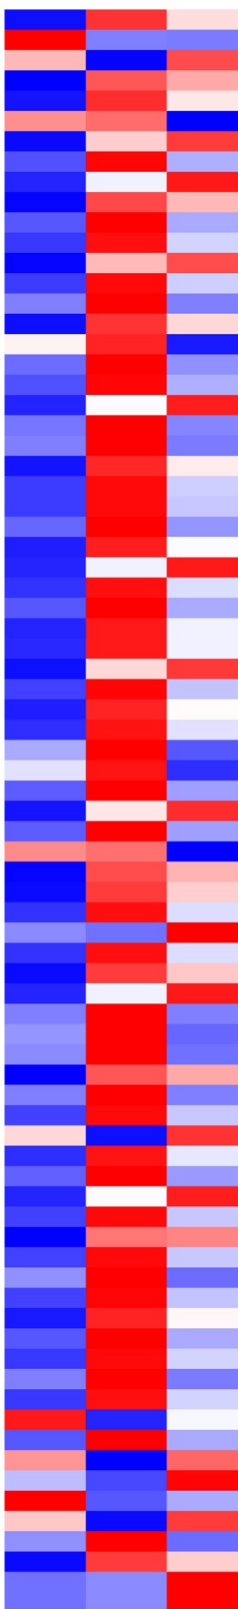

(18:1/18:2/22:6)  
 (18:1/18:2/24:1)  
 (18:1/18:3/20:4)  
 (18:1/18:3/22:6)  
 (18:1/19:1/20:5)  
 (18:1/20:3/20:4)  
 (18:1/20:3/20:5)  
 (18:1/20:3/22:6)  
 (18:1/20:4/20:4)  
 (18:1/20:4/22:6)  
 (18:1/20:4/24:7)  
 (18:1/20:5/20:5)  
 (18:1/20:5/22:5)  
 (18:1/20:5/22:6)  
 (18:1/22:1/22:1)  
 (18:1/22:1/22:5)  
 (18:1/22:5/22:6)  
 (18:1/22:6/22:6)  
 (18:2/18:2/18:2)  
 (18:2/18:2/20:4)  
 (18:2/18:2/22:6)  
 (18:2/20:4/20:4)  
 (18:2/20:4/22:6)  
 (18:2/22:6/22:6)  
 (18:3/18:2/18:2)  
 (18:3/18:2/18:3)  
 (18:3/18:2/20:4)  
 (18:3/18:2/22:6)  
 (18:3/18:3/20:3)  
 (18:3/18:3/22:6)  
 (18:3/20:3/22:6)  
 (18:3/20:4/20:4)  
 (18:3/20:5/20:5)  
 (18:3/20:5/22:6)  
 (18:3/22:6/22:6)  
 (18:4/12:0/16:1)  
 (18:4/12:0/20:3)  
 (18:4/12:0/22:5)  
 (18:4/12:0/22:6)  
 (18:4/14:0/16:1)  
 (18:4/14:0/18:3)  
 (18:4/14:0/22:6)  
 (18:4/16:0/16:0)  
 (18:4/16:0/16:1)  
 (18:4/16:0/18:3)  
 (18:4/16:0/20:4)  
 (18:4/16:0/22:5)  
 (18:4/16:1/16:1)  
 (18:4/16:1/18:1)  
 (18:4/16:1/18:3)  
 (18:4/16:1/20:4)  
 (18:4/16:1/20:5)  
 (18:4/16:1/22:6)  
 (18:4/16:2/18:1)  
 (18:4/18:0/20:5)  
 (18:4/18:1/18:2)  
 (18:4/18:1/20:4)  
 (18:4/18:2/18:2)  
 (18:4/18:2/18:3)  
 (18:4/18:2/20:5)  
 (18:4/18:3/18:3)  
 (18:4/18:3/22:6)  
 (18:4/20:5/20:5)  
 (18:4/20:5/22:6)  
 (18:4/22:5/22:5)  
 (18:4/22:5/22:6)  
 (18:4/22:6/22:6)  
 (19:1/19:1/19:1)  
 (20:0/12:0/12:0)  
 (20:0/16:0/18:1)  
 (20:0/16:0/20:1)  
 (20:0/18:1/18:1)  
 (20:0/18:1/20:4)  
 (20:0/18:1/22:6)  
 (20:0p/16:0/18:0)

n-3 Def  
 EPA-PC  
 EPA-PPE

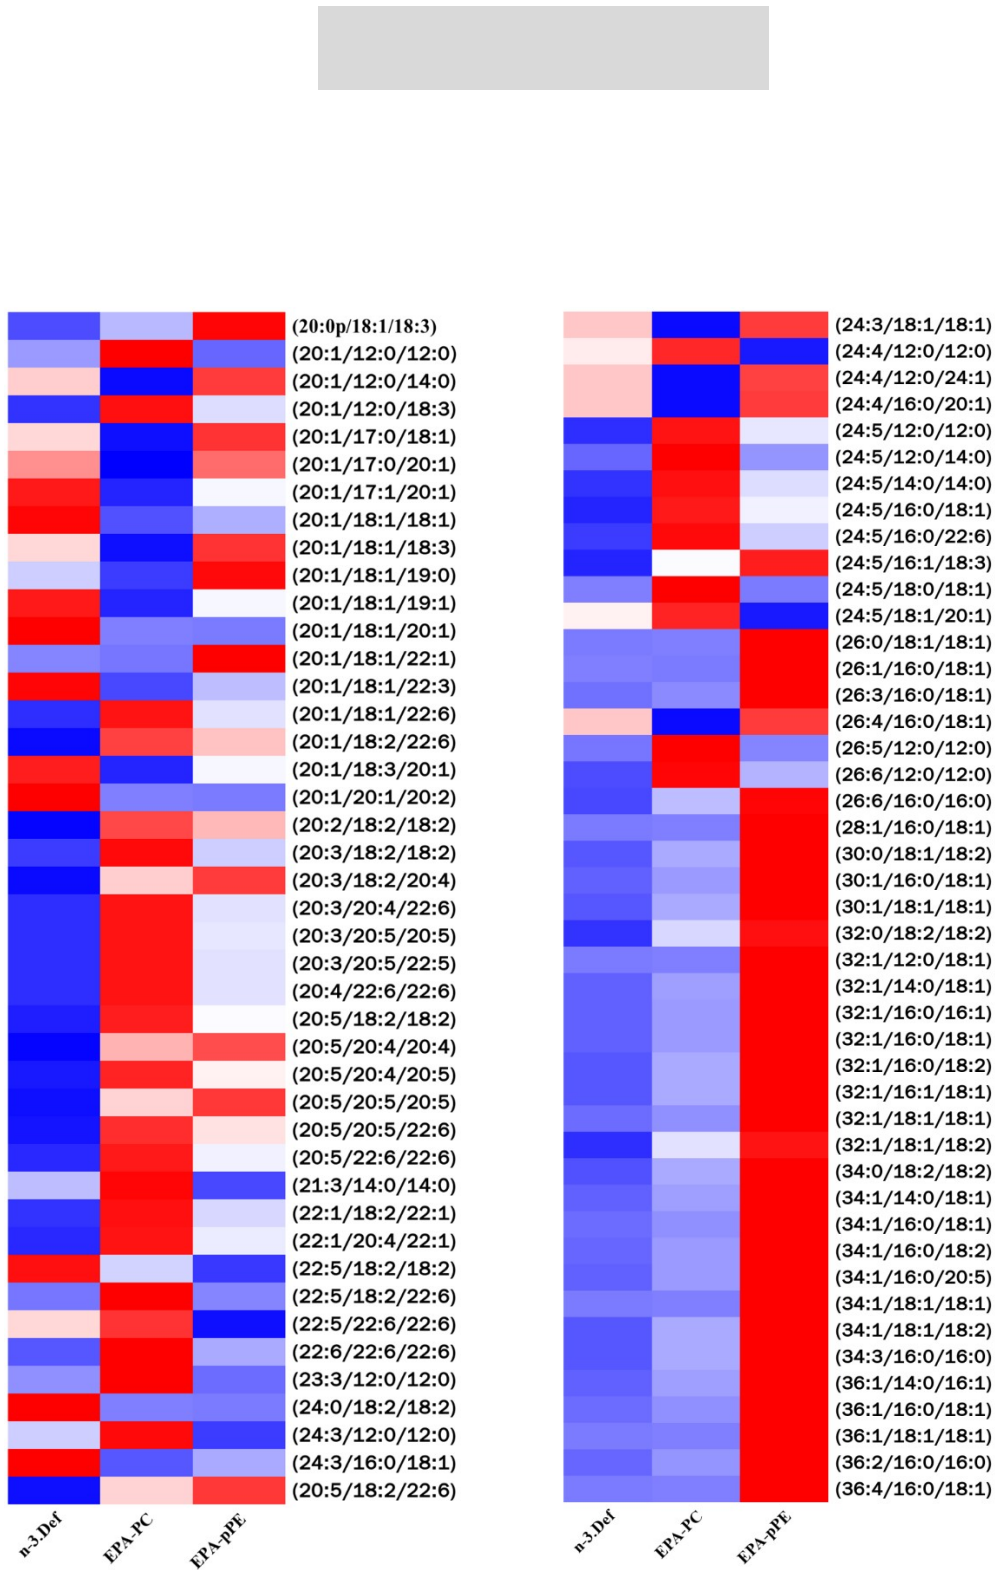

Supplement Figure 1. Heatmaps illustrating the triglycerides profiles of three groups.
